# Supplementary material for: Supramolecular hexagonal nano tubes assembled by vanadium diamine complexes with thiogermanates
Source: Royal Society of Chemistry journal article supplement (doi:10.1039/c5ra27088j), 2016-01-01
Supplement: c5ra27088j1.pdf [file c5ra27088j1.pdf]

## Electronic Supplementary Information (ESI) for

# Supramolecular hexagonal nano tubes assembled by vanadium diamine 5 complexes with thiogermanates

L.-W. Qian, X.-W. Zhao, H.-C. Su, G.-Q. Bian, Q.-Y. Zhu,\* and J. Dai\*

## 10 Content

**Figure S1.** Experimental and calculated XRD patterns of compounds **1** and **2**.

**Figure S2.** Thermogravimetric analysis of compound **2** in the range of 25-200 °C, suggesting one  
15 dap solvent molecule loss.

**Figure S3.** (a) Six molecules of **2** are arranged in a two layer mode forming a hexagonal cycle structure (side view), showing the N–H···S hydrogen bonds. (b) The N–H···O hydrogen bonds in **2** that connect the compactly packed nano-tubes.

20

**Figure S4.** Spacefilling display of self-assembled supramolecular hexagonal nanotube of **2**.

25 **Table S1.** Crystallographic Data and Structural Refinement Parameters for **1** and **2**.

**CCDC 1402143 & 1402144** contain the supplementary crystallographic data for **1** and **2** in this paper.

30

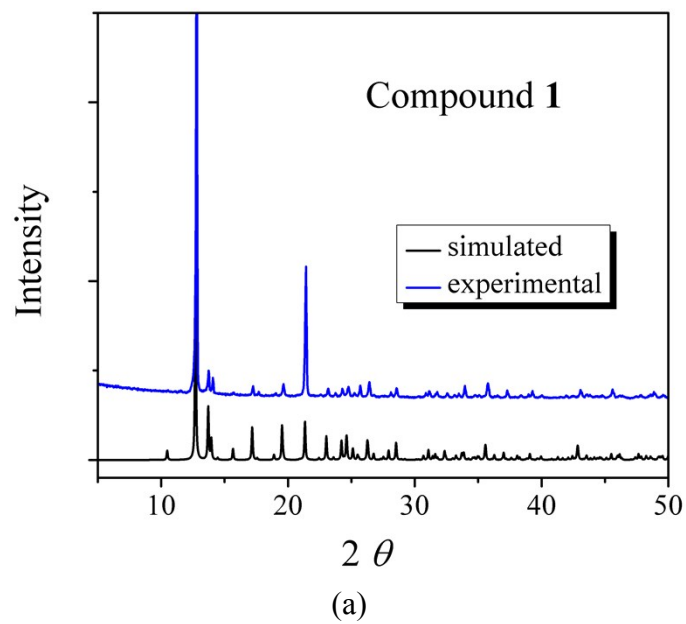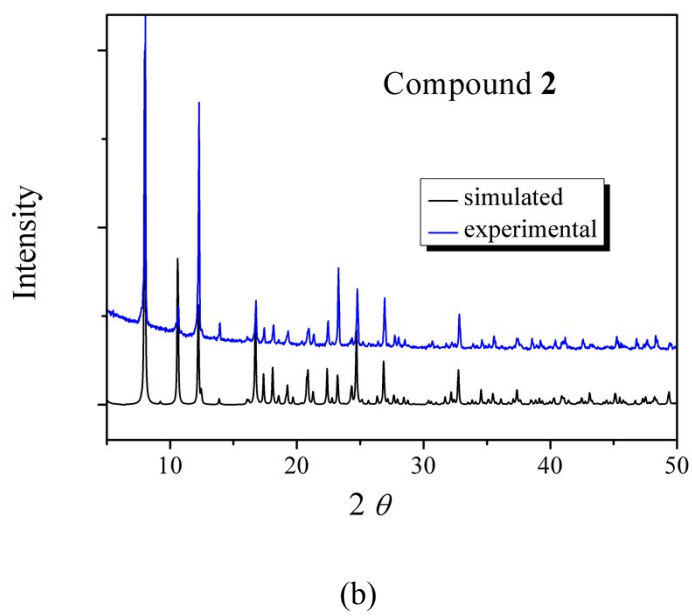

5

**Figure S1.** Experimental and calculated XRD patterns of compounds **1** and **2**.

10

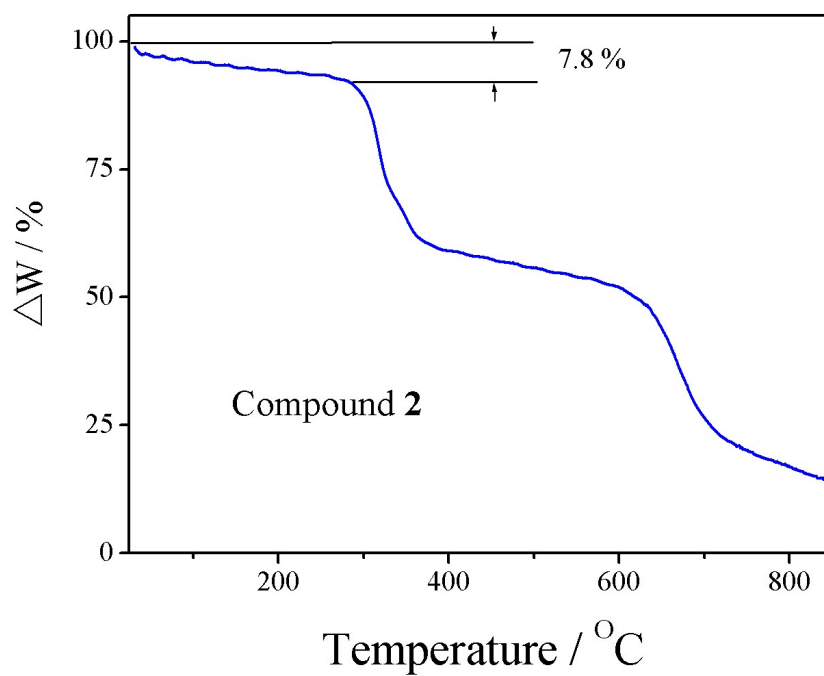

**Figure S2.** Thermogravimetric analysis of compound **2** in the range of 25-200 °C, suggesting one  
5 dap solvent molecule loss.

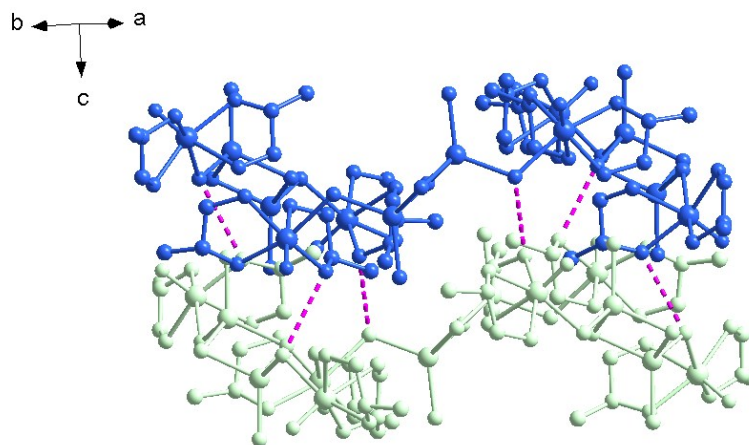

(a)

5

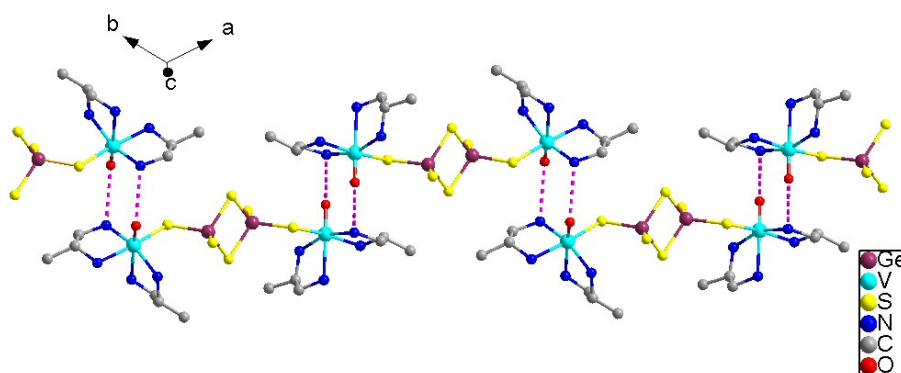

(b)

10 **Figure S3.** (a) Six molecules of **2** are arranged in a two-layer mode forming a hexagonal cycle structure (side view), showing the N–H···S hydrogen bonds. (b) The N–H···O hydrogen bonds in **2** that connect the compactly packed nano-tubes.

15

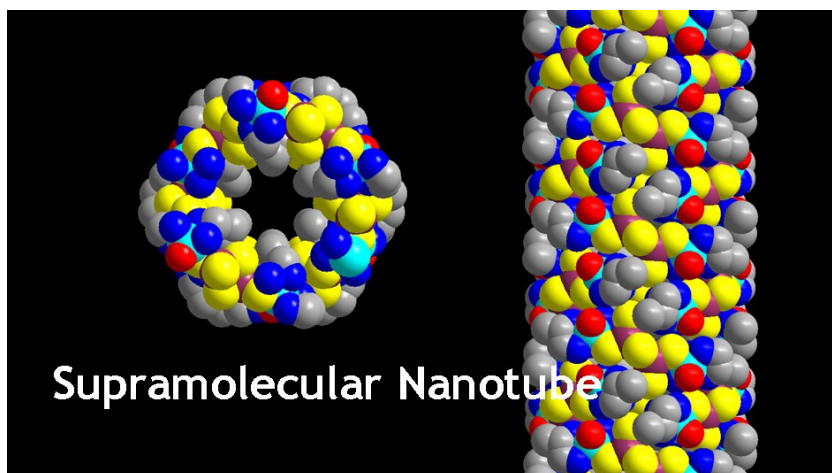

5

**Figure S4.** Spacefilling display of self-assembled supramolecular hexagonal nano tube of 2.

**Table S1.** Crystallographic Data and Structural Refinement Parameters for **1** and **2**.

|                                                             | <b>1</b>                                                                                                   | <b>2</b>                                                                                                      |
|-------------------------------------------------------------|------------------------------------------------------------------------------------------------------------|---------------------------------------------------------------------------------------------------------------|
| Formula                                                     | C <sub>8</sub> H <sub>32</sub> Ge <sub>2</sub> N <sub>8</sub> O <sub>8</sub> S <sub>6</sub> V <sub>2</sub> | C <sub>13.5</sub> H <sub>45</sub> Ge <sub>2</sub> N <sub>9</sub> O <sub>2</sub> S <sub>6</sub> V <sub>2</sub> |
| MW                                                          | 695.83                                                                                                     | 804.99                                                                                                        |
| Cryst size (mm <sup>3</sup> )                               | 0.55×0.15×0.10                                                                                             | 0.65×0.12×0.10                                                                                                |
| Cryst syst                                                  | monoclinic                                                                                                 | trigonal                                                                                                      |
| Space group                                                 | <i>P</i> 2 <sub>1</sub> / <i>n</i>                                                                         | <i>R</i> -3c                                                                                                  |
| <i>a</i> (Å)                                                | 8.3522(17)                                                                                                 | 38.284(5)                                                                                                     |
| <i>b</i> (Å)                                                | 12.682(3)                                                                                                  | 38.284(5)                                                                                                     |
| <i>c</i> (Å)                                                | 11.339(2)                                                                                                  | 11.170(2)                                                                                                     |
| $\alpha$ (deg)                                              | 90                                                                                                         | 90                                                                                                            |
| $\beta$ (deg)                                               | 94.75(3)                                                                                                   | 90                                                                                                            |
| $\gamma$ (deg)                                              | 90                                                                                                         | 120                                                                                                           |
| <i>V</i> (Å <sup>3</sup> )                                  | 1196.9(4)                                                                                                  | 14178(5)                                                                                                      |
| <i>Z</i>                                                    | 2                                                                                                          | 18                                                                                                            |
| $\rho_{\text{calcd}}$ (g cm <sup>-3</sup> )                 | 1.931                                                                                                      | 1.619                                                                                                         |
| <i>F</i> (000)                                              | 700                                                                                                        | 7020                                                                                                          |
| $\mu$ (mm <sup>-1</sup> )                                   | 3.785                                                                                                      | 2.887                                                                                                         |
| <i>T</i> (K)                                                | 293(2)                                                                                                     | 293(2)                                                                                                        |
| Reflns collected                                            | 9910                                                                                                       | 45027                                                                                                         |
| Unique reflns                                               | 4570                                                                                                       | 3623                                                                                                          |
| Observed reflns                                             | 4046                                                                                                       | 3559                                                                                                          |
| <i>R</i> <sub>1</sub> [ <i>I</i> >2 $\sigma$ ( <i>I</i> )]  | 0.0618/0.0523                                                                                              | 0.0894/0.0876                                                                                                 |
| <i>wR</i> <sub>2</sub> [ <i>I</i> >2 $\sigma$ ( <i>I</i> )] | 0.1167/0.1048                                                                                              | 0.1577/0.1568                                                                                                 |
| GOF on <i>F</i> <sup>2</sup>                                | 1.088                                                                                                      | 1.110                                                                                                         |
